# Supplementary material for: Mechanisms Underlying Aboveground and Belowground Litter Decomposition Converge over Time under Nutrient Deposition
Source: MDPI journal article supplement (doi:10.3390/f14010130), 2023-01-11
Supplement: s1 [file s1]

---

### Supplemental information

**Table S1.** Results (*P*-values) showing the effect of nutrient addition on early (1 year) decomposition of leaves and absorptive roots of *Pinus massoniana* and *Schima superba*.

| Species                 | Type             | +N vs. CK |          | +P vs. CK |          | +NP vs. CK |          |
|-------------------------|------------------|-----------|----------|-----------|----------|------------|----------|
|                         |                  | Effect    | <i>P</i> | Effect    | <i>P</i> | Effect     | <i>P</i> |
| <i>Pinus massoniana</i> | Leaves           | +         | 0.027    | +         | < 0.001  | +          | 0.001    |
|                         | Absorptive roots | –         | 0.019    | <i>ns</i> | 0.084    | <i>ns</i>  | 0.959    |
| <i>Schima superba</i>   | Leaves           | <i>ns</i> | 0.657    | +         | 0.008    | <i>ns</i>  | 0.057    |
|                         | Absorptive roots | –         | 0.036    | <i>ns</i> | 0.091    | <i>ns</i>  | 0.669    |

CK, control; +N, nitrogen addition; +P, phosphorus addition; and +NP, addition of both nitrogen and phosphorus. For effect, ‘+’, ‘–’, and ‘*ns*’ indicate positive, negative, and no effect of nutrient addition on decomposition compared to CK, respectively.

**Table S2.** Residual carbon fractions of leaves and absorptive roots decomposing after 3 years decomposition since litterbag placement.

| Substrates                               | CK                            |                              |                              | +N                           |                             |                             | +P                           |                             |                             | +NP                           |                              |                              |
|------------------------------------------|-------------------------------|------------------------------|------------------------------|------------------------------|-----------------------------|-----------------------------|------------------------------|-----------------------------|-----------------------------|-------------------------------|------------------------------|------------------------------|
|                                          | AUR                           | Cell                         | Hemi                         | AUR                          | Cell                        | Hemi                        | AUR                          | Cell                        | Hemi                        | AUR                           | Cell                         | Hemi                         |
| <i>Pinus massoniana</i> leaves           | 36.64<br>(2.15)               | 7.22<br>(1.25)               | 9.79<br>(1.45)               | 36.48<br>(1.44)              | 5.75<br>(0.65)              | 7.90<br>(0.49)              | 34.35<br>(2.05)              | 6.18<br>(0.66)              | 8.93<br>(1.47)              | 36.97<br>(1.82)               | 5.56<br>(0.35)               | 7.62<br>(0.29)               |
| <i>Pinus massoniana</i> absorptive roots | 30.64 <sup>bc</sup><br>(2.34) | 3.39 <sup>a</sup><br>(0.26)  | 5.46 <sup>b</sup><br>(0.15)  | 40.21 <sup>a</sup><br>(2.43) | 3.24 <sup>a</sup><br>(0.07) | 6.21 <sup>a</sup><br>(0.11) | 27.78 <sup>c</sup><br>(2.28) | 2.47 <sup>b</sup><br>(0.15) | 4.48 <sup>c</sup><br>(0.08) | 35.94 <sup>ab</sup><br>(2.79) | 3.07 <sup>a</sup><br>(0.04)  | 5.68 <sup>b</sup><br>(0.18)  |
| <i>Schima superba</i> leaves             | 12.10<br>(1.52)               | 2.79<br>(0.52)               | 3.99<br>(0.20)               | 16.97<br>(1.73)              | 5.20<br>(0.96)              | 6.66<br>(0.85)              | 14.48<br>(1.21)              | 4.21<br>(0.78)              | 5.77<br>(1.13)              | 12.46<br>(1.41)               | 3.46<br>(0.97)               | 3.79<br>(1.15)               |
| <i>Schima superba</i> absorptive roots   | 20.03 <sup>b</sup><br>(1.70)  | 3.54 <sup>bc</sup><br>(0.40) | 4.18 <sup>ab</sup><br>(0.31) | 28.42 <sup>a</sup><br>(1.88) | 4.85 <sup>a</sup><br>(0.40) | 5.11 <sup>a</sup><br>(0.63) | 17.97 <sup>b</sup><br>(0.41) | 3.08 <sup>c</sup><br>(0.31) | 3.61 <sup>b</sup><br>(0.21) | 25.91 <sup>a</sup><br>(1.27)  | 4.25 <sup>ab</sup><br>(0.09) | 4.26 <sup>ab</sup><br>(0.18) |

Values are means (SE,  $n=4$ ), and the unit of the value is %. Significant differences between means were determined using Tukey's honestly significant difference test. Different letters in a row indicate that the same carbon fractions have significant differences among treatments ( $n=4$ ,  $P<0.05$ ). CK, control; +N, nitrogen addition; +P, phosphorus addition; +NP, addition of both nitrogen and phosphorus; AUR, acid unhydrolyzable residue; Cell, cellulose; Hemi, hemicellulose.

**Table S3** Microbial extracellular enzymatic activities of leaves and absorptive roots decomposing after 3 years decomposition since litterbag placement.

|                   |                    |                    | <i>Pinus massoniana</i>      | <i>Pinus massoniana</i>     | <i>Schima superba</i>         | <i>Schima superba</i>       |                            |
|-------------------|--------------------|--------------------|------------------------------|-----------------------------|-------------------------------|-----------------------------|----------------------------|
|                   |                    |                    | Leaves                       | Absorptive Roots            | Leaves                        | Absorptive Roots            |                            |
| CK                | Hydrolytic enzymes | BG                 | 22.81 <sup>b</sup> (4.02)    | 25.15 (3.10)                | 55.58 <sup>b</sup> (23.23)    | 51.87 <sup>a</sup> (5.85)   |                            |
|                   |                    | NAG                | 13.37 <sup>c</sup> (0.94)    | 12.77 (1.51)                | 18.34 <sup>c</sup> (0.98)     | 64.40 <sup>a</sup> (9.22)   |                            |
|                   |                    | CBH                | 1.66 <sup>b</sup> (0.15)     | 2.79 (0.99)                 | 5.46 <sup>b</sup> (1.91)      | 4.35 (1.27)                 |                            |
|                   |                    | AP                 | 482.88 <sup>c</sup> (182.19) | 138.46 <sup>a</sup> (22.76) | 256.61 <sup>b</sup> (122.72)  | 134.20 <sup>a</sup> (10.24) |                            |
|                   | Oxidative enzymes  | PER                | 0.47 <sup>A</sup> (0.06)     | 0.41 <sup>A</sup> (0.14)    | 0.73 (0.45)                   | 0.74 <sup>B</sup> (0.13)    |                            |
|                   |                    | PPO                | 0.35 <sup>B</sup> (0.03)     | 0.16 <sup>A</sup> (0.04)    | 0.10 (0.05)                   | 0.40 <sup>A</sup> (0.04)    |                            |
|                   | +N                 | Hydrolytic enzymes | BG                           | 16.72 <sup>b</sup> (5.42)   | 40.47 (6.15)                  | 56.39 <sup>b</sup> (17.33)  | 54.08 <sup>a</sup> (13.21) |
|                   |                    |                    | NAG                          | 9.59 <sup>c</sup> (0.85)    | 21.39 (8.26)                  | 14.70 <sup>c</sup> (1.41)   | 41.69 <sup>b</sup> (14.66) |
| CBH               |                    |                    | 1.56 <sup>b</sup> (0.28)     | 3.02 (1.48)                 | 4.13 <sup>b</sup> (1.18)      | 3.66 (0.91)                 |                            |
| AP                |                    |                    | 600.61 <sup>c</sup> (96.20)  | 156.70 <sup>a</sup> (9.93)  | 202.60 <sup>b</sup> (20.58)   | 84.90 <sup>b</sup> (9.40)   |                            |
| Oxidative enzymes |                    | PER                | 0.21 <sup>C</sup> (0.04)     | 0.17 <sup>B</sup> (0.03)    | 0.20 (0.06)                   | 0.19 <sup>C</sup> (0.05)    |                            |
|                   |                    | PPO                | 0.27 <sup>B</sup> (0.14)     | 0.07 <sup>B</sup> (0.01)    | 0.07 (0.03)                   | 0.19 <sup>C</sup> (0.08)    |                            |
| +P                | Hydrolytic enzymes | BG                 | 36.25 <sup>a</sup> (7.28)    | 33.56 (10.99)               | 191.02 <sup>a</sup> (14.13)   | 43.90 <sup>ab</sup> (10.99) |                            |
|                   |                    | NAG                | 28.97 <sup>a</sup> (3.79)    | 19.35 (17.40)               | 113.28 <sup>a</sup> (16.49)   | 54.30 <sup>ab</sup> (1.45)  |                            |
|                   |                    | CBH                | 4.43 <sup>a</sup> (0.82)     | 2.04 (0.63)                 | 10.39 <sup>a</sup> (4.12)     | 3.93 (0.54)                 |                            |
|                   |                    | AP                 | 1616.60 <sup>a</sup> (92.34) | 156.38 <sup>a</sup> (7.80)  | 1007.70 <sup>a</sup> (111.43) | 150.96 <sup>a</sup> (14.34) |                            |
|                   | Oxidative enzymes  | PER                | 0.24 <sup>BC</sup> (0.02)    | 0.25 <sup>B</sup> (0.02)    | 0.59 (0.49)                   | 1.00 <sup>A</sup> (0.16)    |                            |
|                   |                    | PPO                | 1.22 <sup>A</sup> (0.53)     | 0.14 <sup>A</sup> (0.02)    | 0.10 (0.04)                   | 0.39 <sup>A</sup> (0.02)    |                            |
| +NP               | Hydrolytic         | BG                 | 21.10 <sup>b</sup> (9.38)    | 34.95 (9.01)                | 166.84 <sup>a</sup> (34.09)   | 31.80 <sup>b</sup> (6.41)   |                            |

---

|           |     |                              |                            |                              |                            |
|-----------|-----|------------------------------|----------------------------|------------------------------|----------------------------|
| enzymes   | NAG | 18.79 <sup>b</sup> (3.71)    | 5.86 (6.00)                | 61.08 <sup>b</sup> (17.30)   | 41.69 <sup>b</sup> (13.80) |
|           | CBH | 5.02 <sup>a</sup> (0.36)     | 2.99 (0.49)                | 3.54 <sup>b</sup> (2.27)     | 3.98 (0.06)                |
|           | AP  | 1285.56 <sup>b</sup> (69.51) | 106.35 <sup>b</sup> (9.57) | 889.09 <sup>a</sup> (256.68) | 79.01 <sup>b</sup> (11.04) |
| Oxidative | PER | 0.31 <sup>B</sup> (0.09)     | 0.24 <sup>B</sup> (0.02)   | 0.79 (0.40)                  | 0.58 <sup>B</sup> (0.03)   |
| enzymes   | PPO | 0.66 <sup>B</sup> (0.36)     | 0.06 <sup>B</sup> (0.02)   | 0.06 (0.04)                  | 0.28 <sup>B</sup> (0.08)   |

---

Values are means  $\pm$  SE ( $n = 4$ ), and the unit is  $\text{nmol g}^{-1} \text{h}^{-1}$ . Significant differences between means were determined using Tukey's honestly significant difference test.

Different letters in a column indicate that the same enzyme have significant differences among treatments ( $n = 4$ ,  $P < 0.05$ ). BG,  $\beta$ -1,4-glucosidase; NAG,  $\beta$ -1,4-N-acetylglucosaminidase; CBH, cellobiohydrolase; AP, acid phosphatase; PER, peroxidase; PPO, polyphenol oxidase. CK, control; +N, nitrogen addition; +P, phosphorus addition; +NP, addition of both nitrogen and phosphorus.
